# Supplementary material for: Rational design of aptazyme riboswitches for efficient control of gene expression in mammalian cells
Source: eLife. 2016 Nov 2;5:e18858. doi: 10.7554/eLife.18858 (PMC5130294; doi:10.7554/eLife.18858)
Supplement: Figure 2—source data 1. — Predicated ΔG of the communication module (ΔGCM), total number of communication-module hydrogen bonds (HBN), a Weighted Hydrogen Bond Score (WHBS), and Weighted Hydrogen-bond and Stacking Score (WHSS) of each test-panel Tc aptazyme are listed along with its observed basal expression (BE) at 0 µM Tc, ligand-inhibited expression (LE) at 100 µM Tc and corrected dynamic range (CDR). n.d. indicates that ΔGCM could not be determined. BE and LE are shown as the percentage of GLuc expression normalized to expression of the CNTL control construct lacking any aptazyme. Aptazymes classified into the optimal group in Figure 2l are shaded. BE, LE and CDR are shown as mean ± S.D. Data are representative of two or three independent experiments. DOI: http://dx.doi.org/10.7554/eLife.18858.006 [file elife-18858-fig2-data1.xlsx]

## Sheet: Sheet1
Figure 2-source data 1. Communication-module scores and expression values of test-panel aptazymes.
Aptazyme	-ΔGcm	HBN	WHBS	WHSS	BE (%)	LE (%)	CDR
Tc01	3.8	12	8.16667	8.64583	2.61 ± 0.09	0.77 ± 0.05	2.06 ± 0.12
Tc02	0.1	8.5	5.25	5.58333	59.52 ± 3.24	19.31 ± 0.34	1.96 ± 0.03
Tc03	0.3	9	5.66667	6	54.29 ± 2.97	7.61 ± 0.34	4.55 ± 0.2
Tc04	n.d.	9	5.66667	5.77083	50.73 ± 2.86	13.97 ± 0.23	2.31 ± 0.04
Tc05	1.2	10	6.5	6.83333	37.71 ± 1.27	1.46 ± 0.02	16.48 ± 0.2
Tc06	1.5	10	6.5	6.97917	26.44 ± 0.51	1.24 ± 0.03	13.57 ± 0.36
Tc07	1.4	11	7.33333	7.625	5.74 ± 0.32	0.81 ± 0.03	4.53 ± 0.16
Tc08	n.d.	8	5	5.10417	62.02 ± 0.44	28.27 ± 2.49	1.33 ± 0.12
Tc09	n.d.	8	5.33333	5.4375	54.39 ± 5.44	14.25 ± 0.66	2.32 ± 0.11
Tc10	n.d.	9	6	6.29167	52.43 ± 2.11	4.28 ± 0.15	7.8 ± 0.27
Tc11	n.d.	10	6.66667	6.95833	30.17 ± 1.1	1.11 ± 0.02	17.24 ± 0.28
Tc12	n.d.	10	6.66667	6.91667	27.45 ± 0.16	0.97 ± 0.08	18.63 ± 1.56
Tc13	n.d.	10	6.66667	7.33333	11.42 ± 0.13	0.50 ± 0.00	14.95 ± 0.09
Tc14	n.d.	9	5.83333	6.125	54.86 ± 2.65	5.37 ± 0.45	6.74 ± 0.57
Tc15	1.2	10	6.5	6.75	40.79 ± 2.05	1.42 ± 0.16	18.44 ± 2.03
Tc16	1.2	10	6.83333	7.6875	9.94 ± 0.20	0.59 ± 0.03	10.77 ± 0.51
Tc17	n.d.	10	6.66667	7.08333	20.66 ± 0.80	1.07 ± 0.02	12.71 ± 0.28
Tc18	n.d.	10	6.66667	6.66667	47.01 ± 4.77	3.29 ± 0.14	9.41 ± 0.40
Tc19	1.4	11	7.16667	7.45833	4.57 ± 0.16	0.75 ± 0.04	3.87 ± 0.20
Tc20	n.d.	9	6.16667	6.45833	40.78 ± 2.10	2.33 ± 0.02	11.16 ± 0.11
Tc21	n.d.	8	5.66667	5.85417	49.33 ± 1.07	9.55 ± 0.09	3.29 ± 0.03
Tc22	1.5	10	6.33333	6.625	49.45 ± 0.76	2.40 ± 0.12	13.57 ± 0.69
Tc23	1.2	10	6.33333	6.58333	49.46 ± 1.12	2.16 ± 0.06	15.1 ± 0.42
Tc24	3.5	11	7	7.47917	6.85 ± 0.14	1.19 ± 0.02	3.78 ± 0.07
Tc25	3.2	11	7	7.39583	12.17 ± 1.34	1.19 ± 0.13	6.75 ± 0.76
Tc26	3.4	11	7	7	31.75 ± 1.79	1.35 ± 0.02	15.52 ± 0.17
Tc27	1.1	10	6.5	6.5	46.97 ± 2.06	2.22 ± 0.01	13.45 ± 0.04
Tc28	1.5	10	7	7.375	33.43 ± 1.98	8.96 ± 0.25	2.38 ± 0.07
Tc29	1.5	10	7.16667	7.54167	8.90 ± 0.48	2.22 ± 0.07	2.56 ± 0.08
Tc30	0.4	11	7	7.29167	10.42 ± 0.88	0.71 ± 0.04	9.41 ± 0.56
Tc31	n.d.	9	6.33333	6.625	32.36 ± 1.12	5.30 ± 0.03	3.7 ± 0.02
Tc32	n.d.	8	6	6.1875	36.90 ± 4.03	13.43 ± 0.59	1.67 ± 0.07
