# Supplementary material for: Rational design of aptazyme riboswitches for efficient control of gene expression in mammalian cells
Source: eLife. 2016 Nov 2;5:e18858. doi: 10.7554/eLife.18858 (PMC5130294; doi:10.7554/eLife.18858)
Supplement: Figure 3—source data 1. — BE and LE (100 µM Tc for Tc aptazymes, 3 mM theophylline for Theo aptazymes, or 180 µM guanine for Gua aptazymes) are shown as the percentage of GLuc expression relative to the GLuc expression of the CNTL control construct. BE, LE and CDR are shown as mean ± S.D. Data are representative of two or three independent experiments. DOI: http://dx.doi.org/10.7554/eLife.18858.010 [file elife-18858-fig3-data1.xlsx]

## Sheet: Sheet1
Figure 3-source data 1. Communication-module scores and expression values of validation-panel aptazymes.
Aptazyme	WHSS	BE (%)	LE (%)	CDR
Tc33	6.35417	48.15 ± 0.38	2.43 ± 0.02	13.01 ± 0.11
Tc34	6.33333	45.40 ± 0.27	1.82 ± 0.13	16.49 ± 1.21
Tc35	6.66667	40.86 ± 1.18	1.66 ± 0.02	14.94 ± 0.18
Tc36	6.89583	19.76 ± 0.99	1.25 ± 0.06	10.39 ± 0.48
Tc37	6.58681	45.42 ± 2.34	2.62 ± 0.04	10.49 ± 0.16
Tc38	6.93403	10.65 ± 0.93	0.57 ± 0.02	12.33 ± 0.42
Tc39	6	41.22 ± 2.22	3.51 ± 0.07	7.49 ± 0.16
Tc40	6.33	35.67 ± 1.33	1.04 ± 0.06	21.95 ± 1.18
Tc41	6.41667	32.15 ± 0.56	2.14 ± 0.10	9.60 ± 0.45
Tc42	6.83333	20.59 ± 0.07	0.94 ± 0.03	13.96 ± 0.38
Tc43	7	18.30 ± 0.67	0.58 ± 0.00	20.25 ± 0.17
Tc44	6.75	49.69 ± 2.89	7.81 ± 0.81	4.08 ± 0.42
Theo1	6.49653	30.88 ± 1.77	1.42 ± 0.01	15.98 ± 0.09
Theo2	6.72569	25.55 ± 1.23	1.56 ± 0.17	12.13 ± 1.34
Theo3	6.15278	57.11 ± 6.50	2.87 ± 0.07	14.65 ± 0.37
Theo4	6.29861	34.09 ± 4.04	1.79 ± 0.18	14.08 ± 1.43
Theo5	6.81944	36.75 ± 1.38	1.47 ± 0.03	18.45 ± 0.34
Theo6	7.42361	17.01 ± 0.25	1.82 ± 0.06	6.88 ± 0.24
Gua1	6.58333	50.54 ± 3.16	14.16 ± 0.38	4.41 ± 0.12
Gua2	6.75	31.96 ± 3.76	4.15 ± 0.17	9.53 ± 0.39
Gua3	6.91667	28.09 ± 1.26	2.02 ± 0.07	17.21 ± 0.59
