# Supplementary material for: Rational design of aptazyme riboswitches for efficient control of gene expression in mammalian cells
Source: eLife journal article supplement (doi:10.7554/elife.18858), 2016-11-02
Supplement: supp [file elife-18858-supp-v1.zip]

**A**

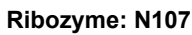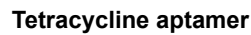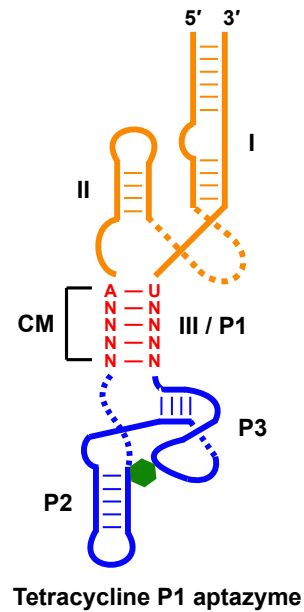

**group 1**

[illegible]

**group II**

[illegible]

**group III**

[illegible]

**group IV**

| Tc29 |    | Tc30 |    | Tc31 |    | Tc32 |    |
|------|----|------|----|------|----|------|----|
| 5'   | 3' | 5'   | 3' | 5'   | 3' | 5'   | 3' |
| A    | U  | A    | U  | A    | U  | A    | U  |
| C    | G  | A    | U  | A    | U  | A    | U  |
| U    | A  | U    | A  | U    | A  | U    | A  |
| A    | U  | U    | A  | G    | U  | A    | U  |
| G    | U  | G    | C  | G    | U  | U    | U  |
| 3'   | 5' | 3'   | 5' | 3'   | 5' | 3'   | 5' |
