# Supplementary figures and images for: Rational design of aptazyme riboswitches for efficient control of gene expression in mammalian cells
Source: eLife journal article supplement (doi:10.7554/elife.18858), 2016-11-02

**Figure 2-figure supplement 1**

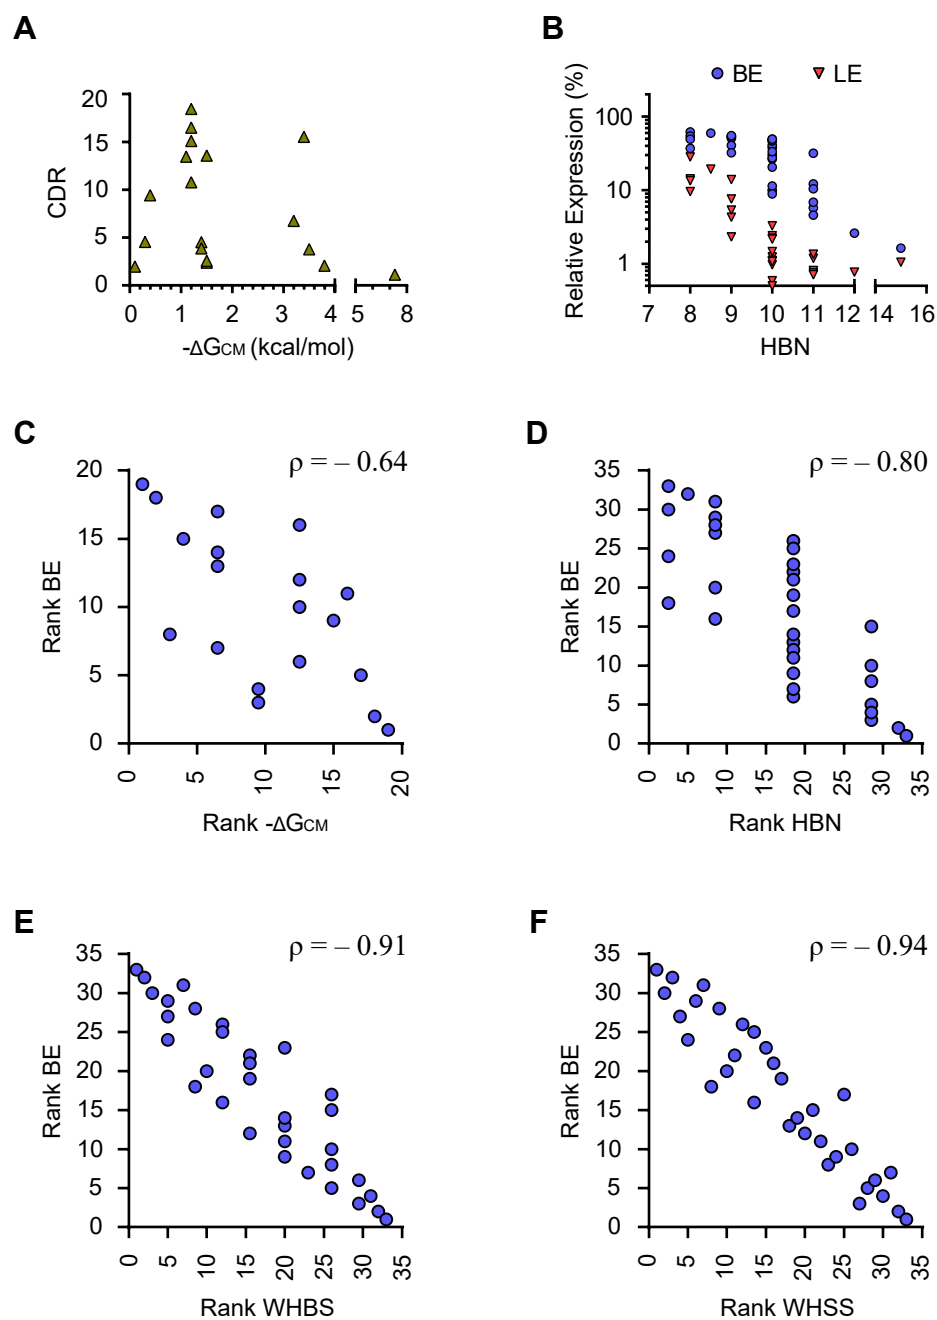

Supplement: supp [file elife-18858-supp-v1.zip]

**Figure 5-figure supplement 1**

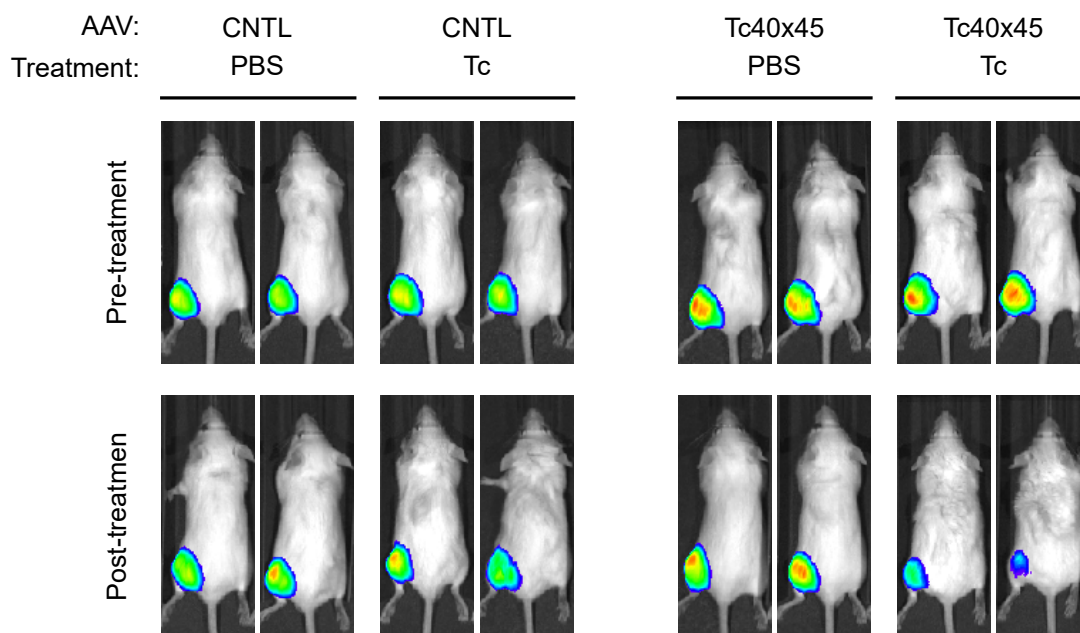

Supplement: supp [file elife-18858-supp-v1.zip]

Figure 4-figure supplement 1

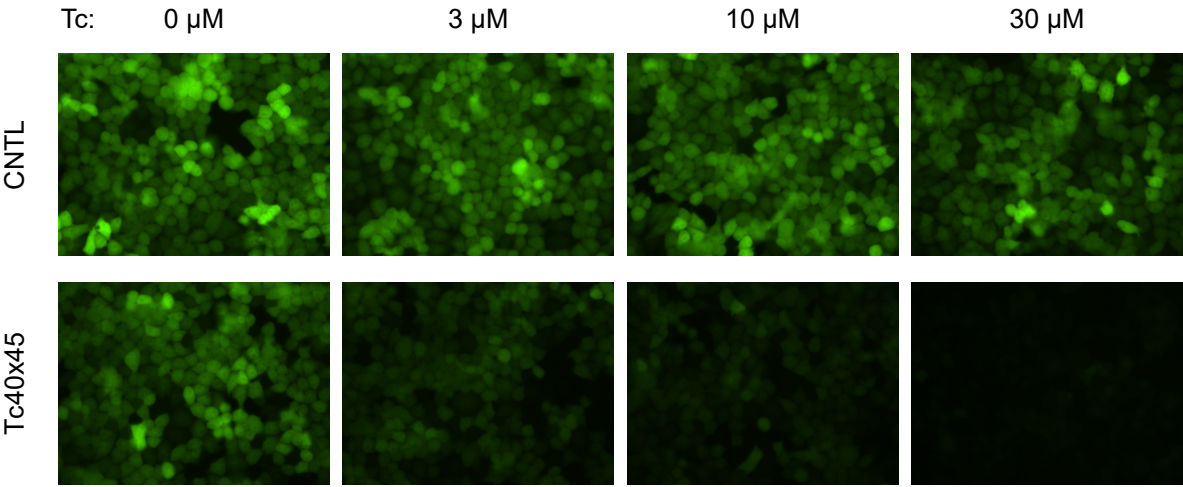

Supplement: supp [file elife-18858-supp-v1.zip]

Figure 3-figure supplement 2

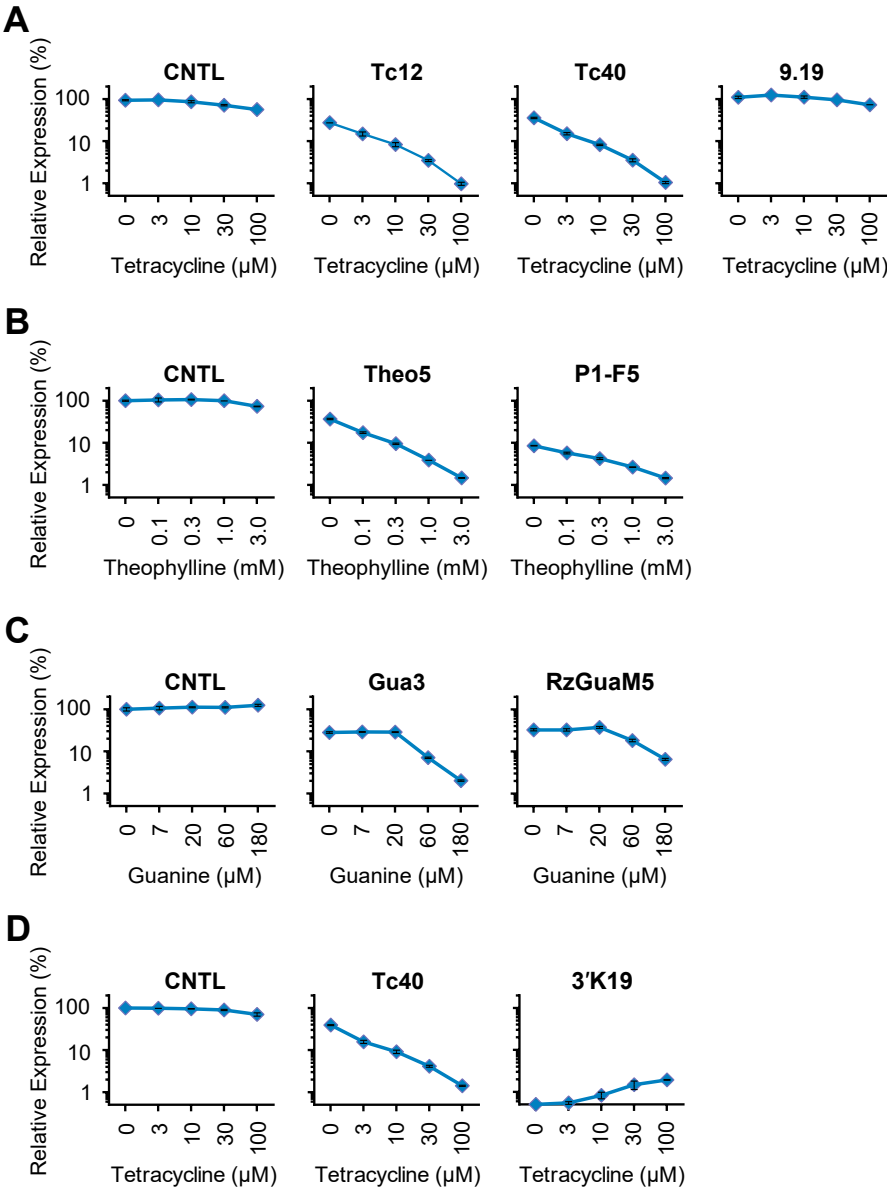

Supplement: supp [file elife-18858-supp-v1.zip]

Figure 2-figure supplement 2

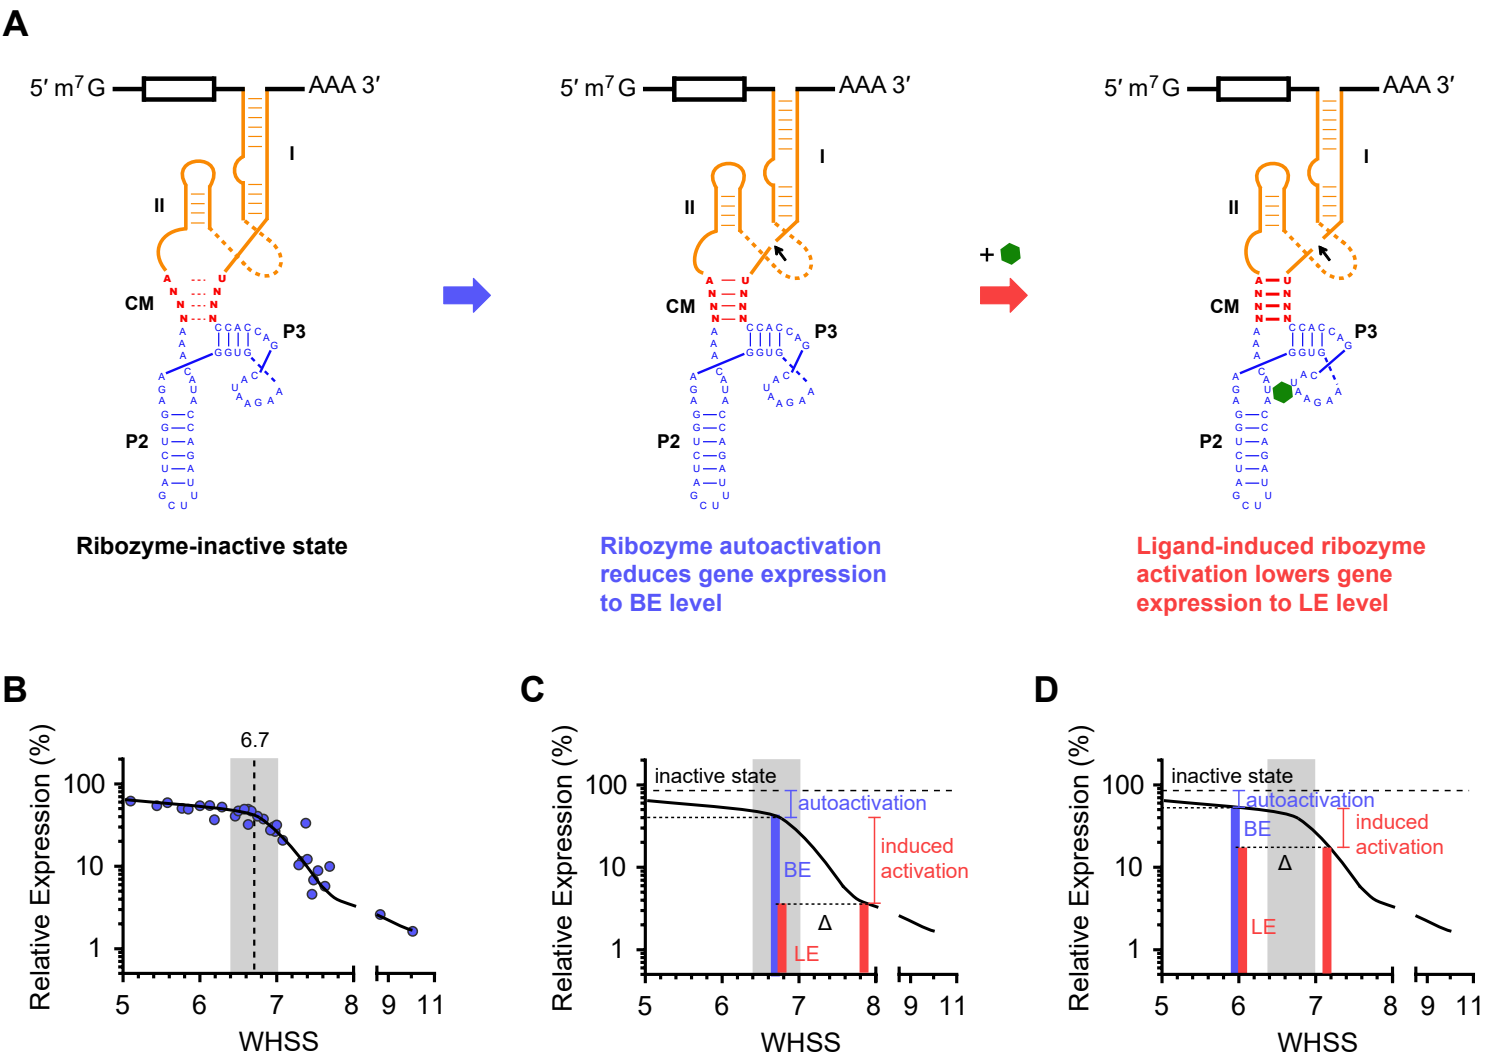

Supplement: supp [file elife-18858-supp-v1.zip]

Figure 1-figure supplement 2

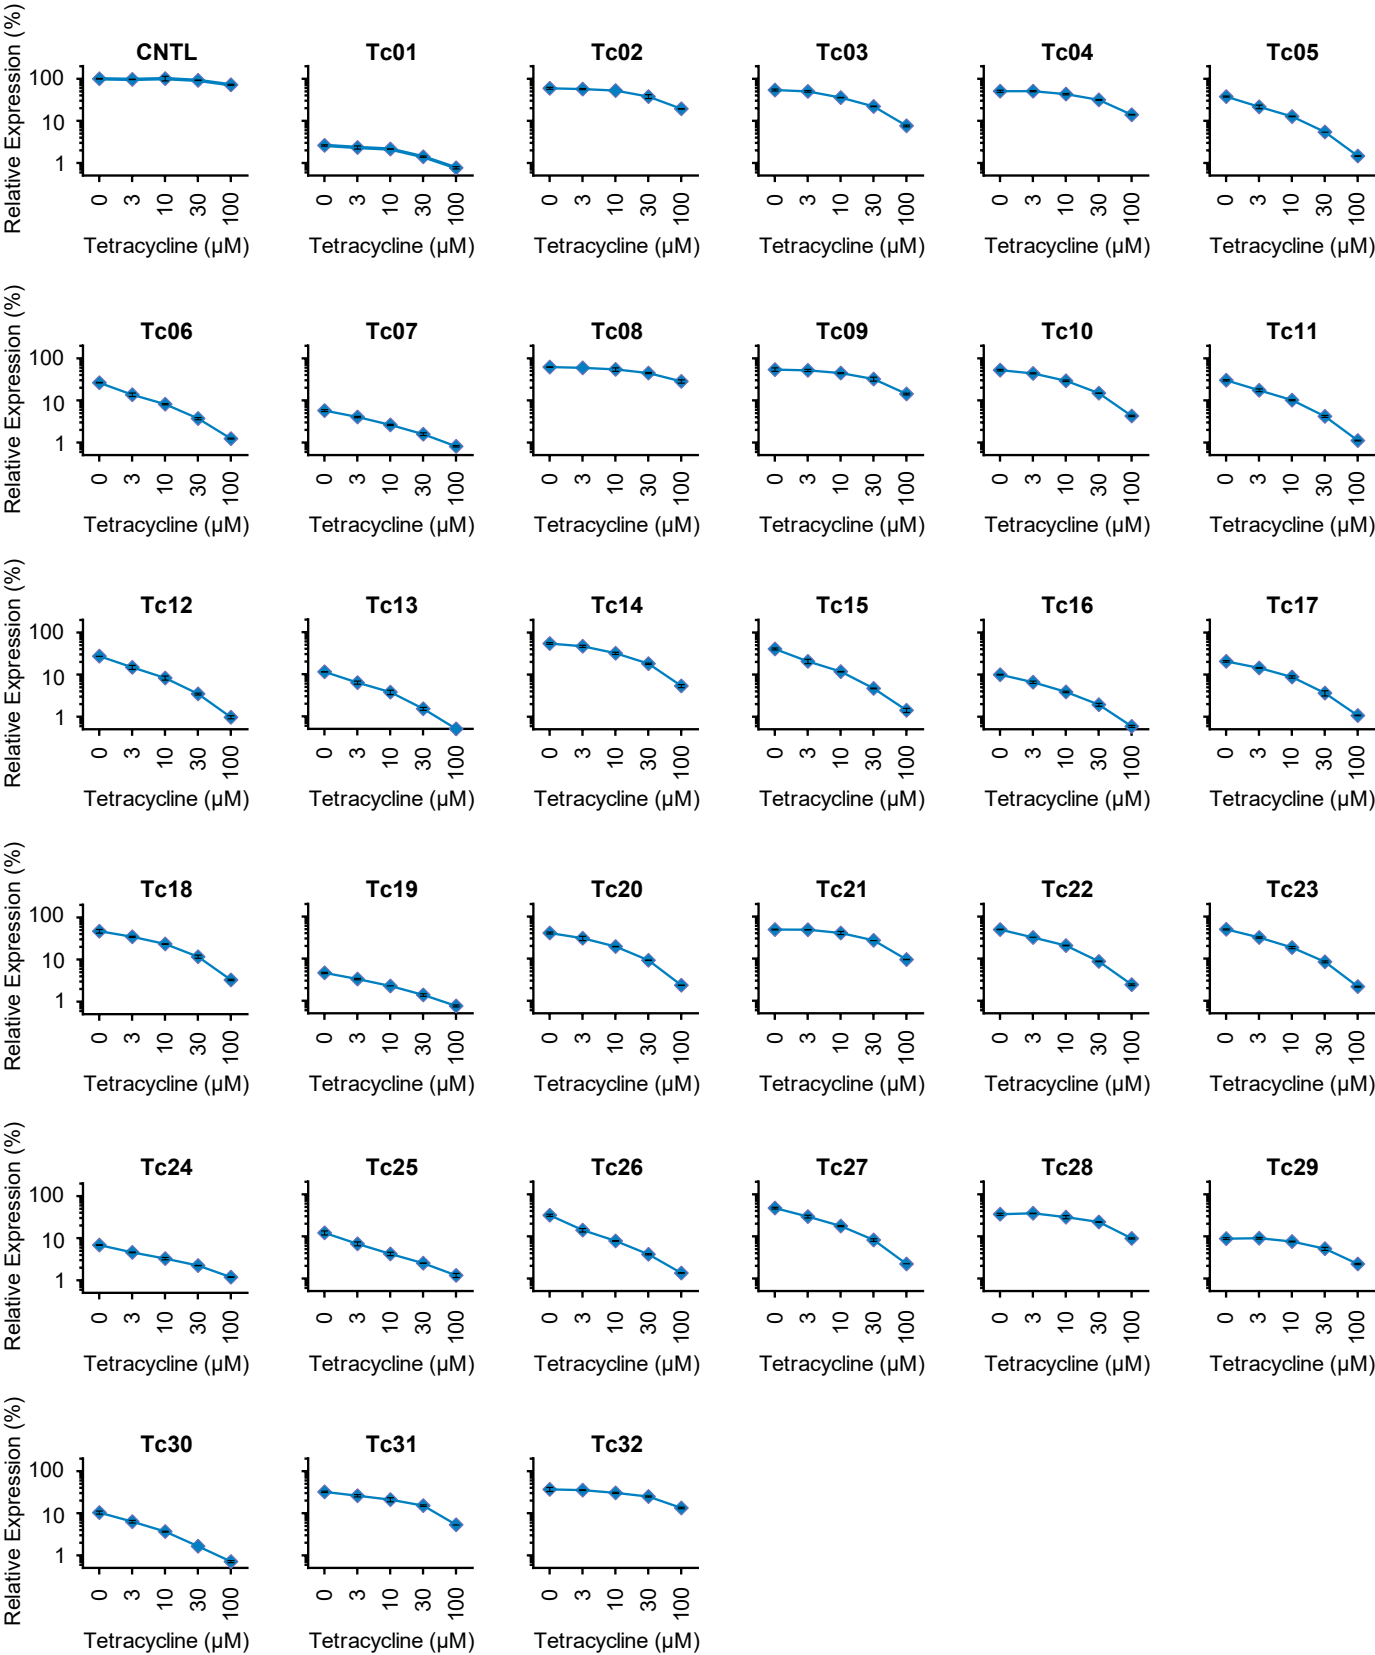

Supplement: supp [file elife-18858-supp-v1.zip]

Figure 3-figure supplement 1

A

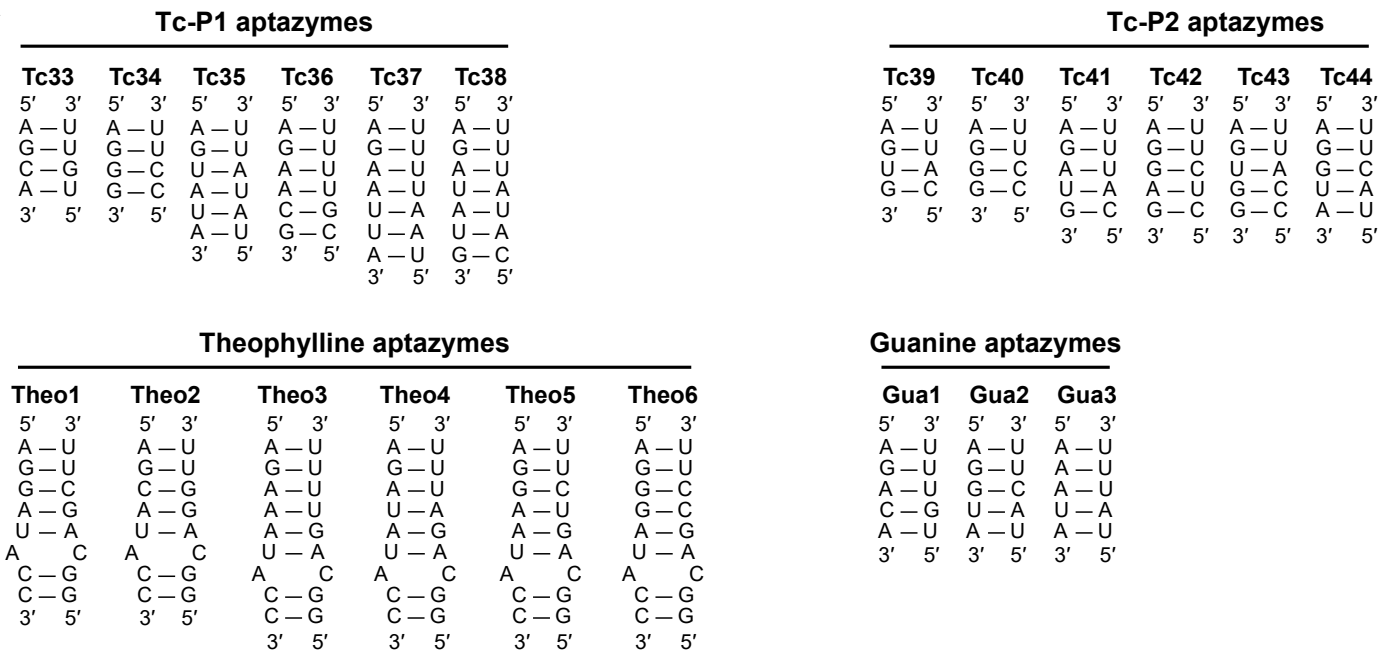

B

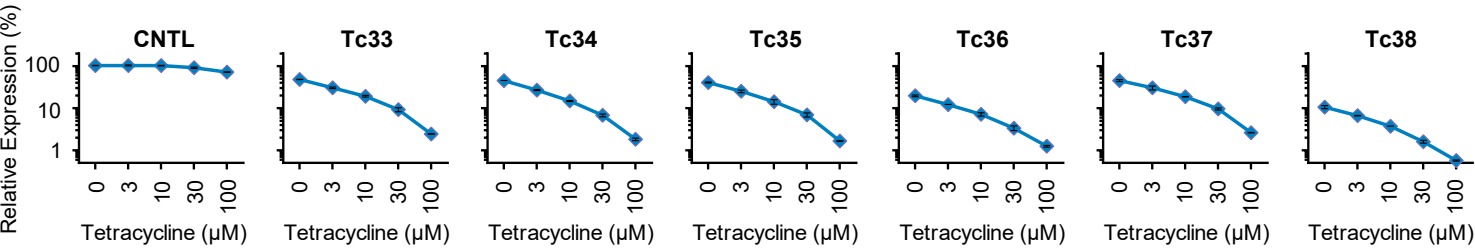

C

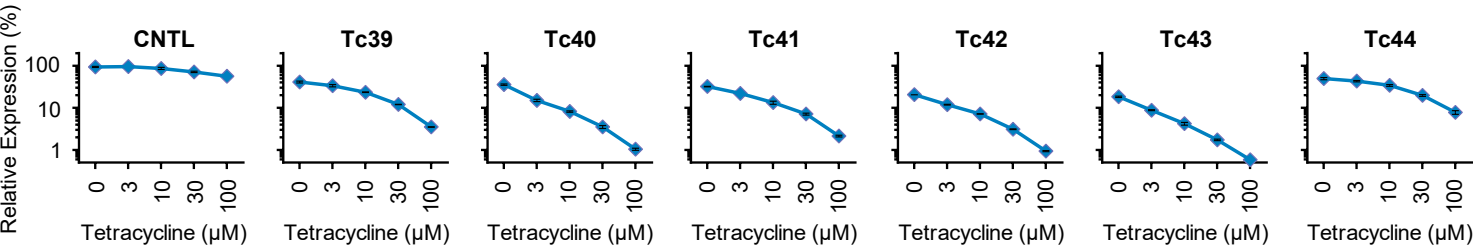

D

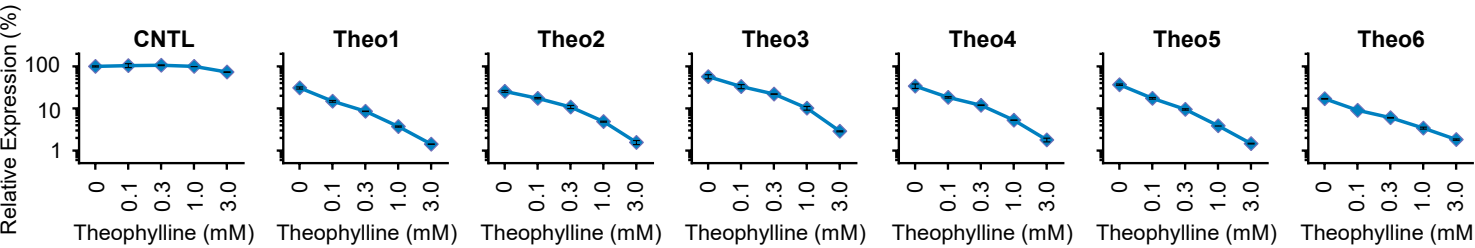

E

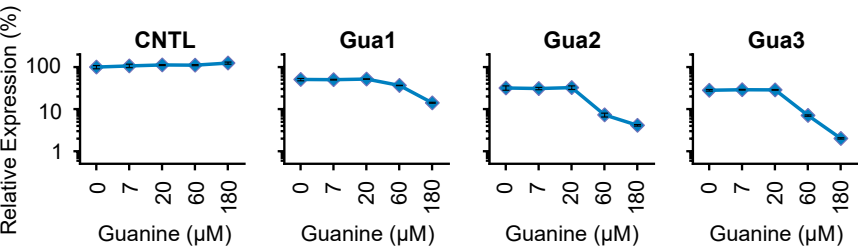

Supplement: supp [file elife-18858-supp-v1.zip]
